# Supplementary material for: Multi-Phase Sit-To-Stand Dynamics Represented Using Koopman Operators Incorporating Segmented Local Dynamics into Globally Linear Models
Source: Research Square preprint supplement (doi:10.21203/rs.3.rs-6507759/v1), 2025-05-22
Supplement: Supplementary file 1 [file 0bc94180e6a92b150b254ae9.docx]

Supplemental Materials: “Multi-Phase Sit-To-Stand Dynamics Represented Using Koopman Operators Incorporating Segmented Local Dynamics into Globally Linear Models”

John Bell* and H. Harry Asada
*corresponding author

# SM-1 Koopman Lifting Linearization

Lifting linearization is a method of representing an autonomous, nonlinear dynamical system, , using a number of nonlinear functions, called “observables” or “lifting functions” . The lifting function is used to map physical states to “lifted states” ; that is, and . Generally, exists in a higher-dimensional space than (hence why is called a “lifted” space and is called a “lifted” state). The dynamic linearization is then performed in terms of ; for discrete-time dynamics, it looks like this:

where the system matrix (also known as a discrete-time transition matrix) fully parameterizes the linear model. Unlike most linear approximations, this linearization is not performed locally about a nominal trajectory; instead, the approximation is global.

Lifted linear approximations are theoretically underpinned by the existence of the Koopman operator1, or composition operator2 :

where is the composition of with ; that is, . For most realistic nonlinear dynamics functions , there exists a function such that the dynamics can be represented exactly as a linear operator 3,4,5. However, existence of such an exact and is only guaranteed if we allow them to be infinite-dimensional; consequently, almost all finite lifting linearizations are approximations.

In practice, the infinite-dimensional Koopman operator is approximated as finite-dimensional system matrix . The simplest method of estimating the matrix from data pairs is to lift the dynamic pairs with into and then to use the Moore-Penrose pseudoinverse to compute an estimate of :

where and . This is the least-squares method of estimating the system matrix, and is the core to the eDMD method of estimating Koopman lifted linear models6. The main advantage of this data-driven training method is that it is extremely simple; one of its key disadvantages is its sensitivity to sampling bias. Alternate integration-based methods exist to identify from data, which eliminate sampling bias7,8; however, their integral calculations do not scale well to high state dimensions. Due to our applied example, human STS, possessing six state dimensions, we chose to use the biased least-squares estimation.

# SM-2 Dynamic modeling of muscles using the Control-Coherent Koopman formulation

## Framing Control-Coherent Koopman (CCK) in General

The modeling of nonlinear dynamics based on Koopman operator theory, originally applicable only to autonomous systems with no control, has recently been extended to a class of non-autonomous control systems by incorporating dynamics of actuators; this process is called “Control-Coherent Koopman (CCK)”9. Specifically, the process of framing a dynamic system for CCK requires the dynamic system to have the following form:

where is the current state, is the future state, and is the current input. Here, is allowed to be a nonlinear function of state , and is a linear operator which is independent of the state . Most physical systems with control inputs do not, however, have this form; instead, we can consider a more general nonlinear form:

where is allowed to be a nonlinear function of state , and is used to represent the input of the nonlinear system.

Asada and Solano-Castellanos reframe general systems with input to systems with a constant-coefficient input by introducing an “actuator state” , such that the nonlinear system’s input can be represented as a function of the actuator state and the system state :

The actuator state , in turn, needs to be modeled with its own dynamics with a constant-coefficient input :

For robotic systems, the actuator model can represent the internal dynamics of a gear-motor actuator which is connected to the robot via a series elastic actuator9; in this case, the actuator state is the shaft angle of the motor, the input is the motor’s driving electric current, and the series elastic actuator’s spring characteristic is used to calculate joint torques from the actuator angle and the joint angle (which is part of the state ).

When the actuator model in equation and the output model in equation are combined with the nonlinear state equation in equation , this generates the following coupled system:

If the state and actuator state are collectively considered part of an “augmented state”, then the dynamics of this augmented state satisfy the structure of equation ; i.e., the input to the system has a constant coefficient . As such, the system has been framed in a way compatible with Control-Coherent Koopman.

## Framing STS for CCK Modeling

For human STS, the actuators are muscle-tendon-joint systems; these are well-studied, and known to be extremely complex. Simulation systems such as OpenSim10 exist which can apply commonly accepted muscle and tendon models (Hill-type models11,12,13) in the context of full-body biomechanics. In the current work, we used a significantly simpler actuator model than the Hill model to represent the muscular actuator of joints; in this supplemental section, we show that the required conditions for a CCK actuator model are satisfied by a Hill-type muscle model.

Hill's three-element muscle model relates the length of a muscle with the force it produces and the activation (i.e., actual muscle unit recruitment) it receives. Specifically, it involves modeling the muscle as three elements: a contractile element , a parallel element , and a series element . is directly actuated by the activation , but the other elements are passive springs. Summarizing the structure of the model as per Martins et al.13:

Structural Equations

Constitutive Equations

These equations are often presented in a nondimensionalized form; however, we do not do this here, to maintain simplicity.

To construct an “actuator equation” from this as per the CCK framing, it must be considered how each of its terms related to the ideas of the larger-scale system’s (kinematic) state , as well as the output force/torque that drives the larger-scale system. The length of the muscle is determined mostly by the kinematic state of the human body as a whole, and the muscle force is the output of the actuator. Of note is that equation involves the time derivative ; this makes the length a candidate for an actuator state . Considering this, we can combine the Hill model equations to create the following actuator model:

and the following output model:

The control input to this actuator model is the muscle activation ; however, it is not linearly involved in the muscle dynamics, and therefore this actuator model does not (by itself) produce a valid framing for CCK.

To correct this, we consider that the act of activating a muscle using neural excitation is itself also a delayed process; Zajac11 models this as a low-pass filter with a state of , and an input , , that he defines as “rectified neural excitation”:

where , , is a constant parameter. This is a nonlinear low-pass filter, with a variable time constant: its time constant is during neural activation and during neural deactivation. Schutte et al.12 simplifies this to a linear first-order system by assuming that ; i.e., that the time constant during activation and deactivation are the same:

If we consider an actuator state , then and form a second-order nonlinear dynamic model for , and forms the output equation. This framing, however, has an input that is linearly involved in the dynamic equation , with a constant coefficient . As such, this combined actuator model satisfies the requirements for a valid CCK framing.

# SM-3 Animation Video Clips of STS Transition Modeling

The supplementary video for this work is composed of 5 clips. Here are summaries of their contents (also included in title slides inside the supplementary video):

## Clip 1 (Start Time: 0:00)

Shown here is a sample human experimental trial from the Holmes 2019 dataset14. (Specifically, Subject 1, Natural STS Trial 1)

Clips 1 and 2 serve to explain the standards used in the following clips, which communicate the results of this work. (Clips 1 and 2 do no present any results from this work.)

## Clip 2 (Start Time: 0:33)

Shown here are all 129 “Natural” human experimental trials without force perturbations from the Holmes 2019 dataset14.

These 129 STS trajectories are overlaid upon each other transparently, and animated simultaneously.

## Clip 3 (Start Time: 0:51)

Shown here is the STS trajectory simulated by the autonomous SMP-Koopman lifted linear model, with an initial state (joint angles and velocities) set at the average initial state of the human STS dataset14.

It is compared to the human STS dataset, shown in the background.

## Clip 4 (Start Time: 1:25)

Shown here are selected steps during a single LQR optimization process, specifically the process which optimizes the and matrices to minimize the cost function , which measures the distance between the simulated STS trajectory and a ground-truth STS trajectory computed by averaging the human STS trajectories.

The simulation for each optimization step is shown, and is compared to the human STS dataset, shown in the background.

## Clip 5 (Start Time: 2:19)

The LQR optimization process was run several times; shown here is the STS simulation result with the lowest cost found over these several optimization runs.

It is compared to the human STS dataset, shown in the background.

# SM-4 Pseudocode

There are four key data-processing processes in the codebase. Each of them can be run separately:

1. Autonomous System Modeling (run_autonomous_system.m)
2. Autonomous System Modeling: Hyperparameter Study (run_autonomous_system_hyperparameter_study.m)
3. Feedback Control System Modeling (run_feedback_system.m)
4. Terminal Convergence Rate Analysis (run_terminal_convergence_analysis.m)

## A. Autonomous System Modeling (run_autonomous_system.m)

### Script 1: Data Loading (scripts/autonomous/script_01_data_loading.m)

1. Open the dataset of Holmes et al.14, stored in the holmes_2019_STS_trajectories\ folder.
2. For each motion capture trajectory in the STS dataset, estimate average joint angles, and calculate joint position trajectories. Numerically differentiate the joint position trajectories to generate joint velocity and acceleration trajectories.
3. Combine all of the joint-angle STS trajectories corresponding to “natural” motion into a single MATLAB struct array, raw_human_dataset.
4. Create a copy of raw_human_dataset called human_dataset, in which all STS trajectories in which a disturbance was applied are removed.
5. Add metadata to human_dataset.
6. Save this version of human_dataset to /human_datasets/human_dataset_N.mat.
7. Cut off all STS trajectories in human_dataset to have a maximum duration of 2.5 seconds.
8. Save this version of human_dataset to /human_datasets/human_dataset_N_time_cutoff.mat.

### Script 2: Define Human Parameters (scripts/autonomous/script_02_define_human_parameters.m)

Define link lengths and mass properties, and seat coefficient of friction. These are to be used in either calculation of the human center-of-mass or of calculation of the dynamics of a mechanistic model of the human body as a triple-pendulum. These parameters are stored in the MATLAB struct array human_param.

### Script 3: Generate Timestep Pairs from Human Dataset (scripts/autonomous/script_03_generate_ts_pairs_from_human_data.m)

1. Iterate through the STS trajectories of human_dataset: For each STS trajectory, identify all possible prior–next state pairs separated by a single simulation timestep.
2. Collect all of these in a single MATLAB struct array, human_ts_pairs, with two main sub-arrays: human_ts_pairs.prev and human_ts_pairs.next. Each of these does not distinguish between different trajectories or human subjects.
3. Add the original trajectory data from to human_dataset to human_ts_pairs, as well as additional metadata.

### Script 4: Koopman Model Setup and Training (scripts/autonomous/script_04_koopman_setup_and_training.m)

1. Define a center-of-mass (COM) function COM_remap(x) which transforms the human state (specifically, the joint angles stored in ) to the COM position relative to the ankle, based on the human body parameters defined in human_param. Also calculate the derivative of that function, COM_remap_deriv(x).
2. **USER INPUT** Set the number of membership functions to utilize, as well as the shape factor for the membership functions, .
3. Take all states in the human_ts_pairs.next STS dataset, and calculate the COM for each state in the dataset. Utilize -means clustering to cluster these COM points into clusters and report these clusters, as well as their means and standard deviations , in the MATLAB struct clust.
4. Define membership functions , defined as follows:

The function RBF_eval(x) takes in a state and returns all membership function outputs, stacked as a vector. The MATLAB cell array RBF_set stores each membership function individually. The MATLAB cell array RBF_deriv_set stores each membership function derivative ; this calculation utilizes COM_remap_deriv.

1. Define SMP functions using the membership functions . Store this information in the MATLAB struct array SMP_lift.
2. Define the SMP inversion function as ginv.
3. Use SMP_lift to lift the human state data in human_ts_pairs to the form of a lifted state data . Use ridge regression to find the system matrix which minimizes the following cost :

Set this system matrix as model.

### Script 5: Simulation (scripts/autonomous/script_05_simulation.m)

1. Define the number of simulation steps to take for the 2.5 second duration (2.5 s * 480 Hz = 1200 timesteps) as sim_steps.
2. Iterate over all experimental human trajectories in human_ts_pairs and find the mean state trajectory over all experimental human trajectories. Store this as human_traj_ref.
3. Define the initial simulation state as the initial state of human_traj_ref.
4. Use SMP_lift to lift the initial simulation state to the initial simulation lifted state . Store this as the first element of the array z_test_sim_history, which will ultimately contain all of the simulation lifted states.
5. Iterate over sim_steps timesteps: Calculate subsequent lifted states with , and store them in z_test_sim_history.
6. Use ginv to calculate the state trajectory simulation state_test_sim_history from the lifted state trajectory simulation z_test_sim_history.

### Script 6: Local Affine Dynamic System Analysis (scripts/autonomous/script_06_local_system_analysis.m)

1. **USER INPUT** Define three states of interest poi_1, poi_2, and poi_3 as MATLAB struct arrays, initialized with COM positions poi_?.COM.
2. Compute a state for each point of interest (POI) using the following scheme:
   1. Use COM_remap to compute the corresponding COM for every human STS data point in human_ts_pairs.next.
   2. Identify all human STS data points with a COM within 0.02 m of the POI’s COM.
   3. Average the states of the identified human STS data points, and set this to be the POI’s state . Set this to be poi_?.x.
3. For each POI, use its state to compute the local affine dynamic model at that state. (See Methods). Store this as poi_?.local_sys.taylor.
4. For each POI, calculate the local equilibrium . Store this as poi_?.local_sys.taylor.eig_info.equil.
5. For each POI, use COM_remap to compute the COM corresponding to the local equilibrium . Store this as poi_?.local_sys.taylor.eig_info.COM_equil.
6. Save all the processed data produced in Scripts 1–6 in results_for_figures/paper_auto_results.mat.

## B. Autonomous System Modeling: Hyperparameter Study (run_autonomous_system_hyperparameter_study.m)

### Script 1: Data Loading (scripts/autonomous/script_01_data_loading.m)

Same script as for Process A; see Process A Script 1 pseudocode.

### Script 2: Define Human Parameters (scripts/autonomous/script_02_define_human_parameters.m)

Same script as for Process A; see Process A Script 2 pseudocode.

### Script 3: Generate Timestep Pairs from Human Dataset (scripts/autonomous/script_03_generate_ts_pairs_from_human_data.m)

Same script as for Process A; see Process A Script 3 pseudocode.

### Script 4 (alternative): Membership Function Hyperparameter Study (scripts/autonomous/script_04ALTERNATIVE_hyperparameter_study.m)

1. **USER INPUT** Define a range of different values of and to test for the hyperparameter study. Store these in a MATLAB struct array param_study as param_study.M and param_study.eps.
2. Define the SMP inversion function as ginv.
3. Iterate over the different values of and in loops. In the outer loop, iterate over values of :
   1. Take all states in the human_ts_pairs.next STS dataset, and calculate the COM for each state in the dataset. Utilize -means clustering to cluster these COM points into clusters and report these clusters, as well as their means and standard deviations , in the MATLAB struct clust.
   2. In the inner loop, iterate over values of :
      1. Define membership functions , defined as follows:

The function RBF_eval(x) takes in a state and returns all membership function outputs, stacked as a vector. The MATLAB cell array RBF_set stores each membership function individually. The MATLAB cell array RBF_deriv_set stores each membership function derivative ; this calculation utilizes COM_remap_deriv.

- - 1. Define SMP functions using the membership functions . Store this information in the MATLAB struct array SMP_lift.
    2. Iterate over each separate human STS trajectory stored in human_ts_pairs. Call the STS trajectory currently being considered at each iteration “traj”:
       1. Take the human_ts_pairs timestep pairs, and remove all timestep pairs which originated from traj. Store this cropped dataset as dset.
       2. Use SMP_lift to lift the human state data in dset to the form of a lifted state data . Use ridge regression to find the system matrix which minimizes the following cost :

Set this system matrix as model.

- - - 1. Define the number of simulation steps to take, sim_steps, as the one less than the number of time points in traj.
      2. Define the initial simulation state as the initial state of traj.
      3. Use SMP_lift to lift the initial simulation state to the initial simulation lifted state . Store this as the first element of the array z_test_sim_history, which will ultimately contain all of the simulation lifted states.
      4. Use ginv to calculate the state trajectory simulation state_test_sim_history from the lifted state trajectory simulation z_test_sim_history.
      5. Calculate the prediction error trajectory traj_error by subtracting state_test_sim_history – traj.
      6. Compute a scalar error_score for the trajectory as a whole by taking the magnitude of traj_error at each time point, and then averaging over the time points.
    1. Average the error_score computed for each trajectory over the trajectories. This is the LOOCV error score for the specific combination of and being tested.

1. Store all of the LOOCV error scores for each combination of and as the MATLAB array param_study.LOOC_error.
2. Save param_study in results_for_figures/paper_param_study_results.mat.

## C. Feedback Control System Modeling (run_feedback_system.m)

### Script 1: Data Loading (scripts/feedback_system/script_01_data_loading.m)

Same content as script as for Process A; see Process A Script 1 pseudocode.

### Script 2: Define Human Parameters (scripts/feedback_system/script_02_define_human_parameters.m)

Same content as script as for Process A; see Process A Script 2 pseudocode.

### Script 3: Mechanistic Model Simulated Data Generation (scripts/feedback_system/script_03_simulated_data_generate.m)

1. **USER INPUT** Specify the simulation timestep sim_dt (in terms of multiples of the human dataset’s simulation timestep) and as well as the actuator model’s time constant and stiffness. Set these to actuator_param. Also specify the height of the buffer zone over the seat that will be used in the simulation, seat_height_offset.
2. **USER INPUT** Specify the standard deviations for random excitation of the mechanistic model, specifically standard deviations of the input (input_std), the joint angles (theta_var_std), and the joint velocities (theta_d_var_std).
3. The actuator state perturbation standard deviation (gamma_var_std) is calculated by dividing the input perturbation standard deviation by the actuator model’s stiffness.
4. **USER INPUT** Specify how many mechanistic-model simulated data pairs to generate per human STS dataset trajectory, N_sim_per_traj.
5. Iterate over experimental human STS trajectories in human_dataset; call the iterated experimental human STS trajectory “traj”:
   1. Calculate the effective seat height seat_height for simulations which will use traj as a reference for generating initial conditions:
      1. Using the human parameters human_param, calculate the vertical of the hip joint at the initial state of traj.
      2. Add seat_height_offset to this hip joint vertical position to generate the effective seat height seat_height.
   2. Generate N_sim_per_traj random initial conditions (augmented state state_aug_ic and input_ic) for the mechanistic model simulation, using the following procedure N_sim_per_traj times:
      1. Randomly select a state human_traj_state at some point in traj, using a discrete uniform distribution.
      2. Randomly generate perturbations using a normal distribution, with zero mean and differing standard deviations:
         1. Input perturbation input_pert, with standard deviation input_std.
         2. Joint angles perturbation theta_pert, with standard deviation theta_var_std.
         3. Joint angles perturbation theta_d_pert, with standard deviation theta_d_var_std.
         4. Actuator state perturbation gamma_pert, with standard deviation gamma_std.
      3. Combine human_traj_state with the perturbations to generate an initial condition for simulation as follows:
         1. Add theta_pert to the joint angles of human_traj_state to generate the angle initial condition theta_ic.
         2. Add theta_d_pert to the joint velocities of human_traj_state to generate the angular velocity initial condition theta_d_ic.
         3. Add gamma_pert to theta_ic to generate the actuator state initial condition gamma_ic.
         4. Set input_pert to the input input_ic.
         5. Concatenate [theta_ic;theta_d_ic;gamma_ic] as a the augmented state initial condition state_aug_ic.
   3. Generate a function sim_dyn which takes an augmented state initial condition state_aug_ic and input input_ic, and returns the augmented state simulated after the passage of a simulation timestep sim_dt. This is how it works:
      1. Using the actuator model , the actuator state derivative and the joint torques are calculated from the current actuator state , the current joint angles , and the input .
      2. The human’s current COM is calculated from the current joint angles . If the horizontal COM is outside the base of support of the foot, then set the ankle joint torque to zero.
      3. Calculate the human’s hip joint height.
         1. If this is above seat_height:
            1. Compute the joint accelerations corresponding to a triple-inverted-pendulum driven by joint torques , with no seat contact modeled. Report these .
         2. Else:
            1. Compute the joint accelerations corresponding to a triple-inverted-pendulum driven by joint torques , with seat-contact normal () and frictional () forces enforcing that the hip’s acceleration is zero both horizontally and vertically. Also, using the friction coefficient , calculate the maximum frictional force .

If would need to be zero or tensile:

Compute the joint accelerations corresponding to a triple-inverted-pendulum driven by joint torques , with no seat contact modeled. Report these .

Elseif :

Compute the joint accelerations corresponding to a triple-inverted-pendulum driven by joint torques , with a seat-contact normal () force enforcing that the hip’s acceleration is zero vertically, and a seat-contact frictional () force set to . Report these .

Elseif :

Compute the joint accelerations corresponding to a triple-inverted-pendulum driven by joint torques , with a seat-contact normal () force enforcing that the hip’s acceleration is zero vertically, and a seat-contact frictional () force set to . Report these .

Else ():

Report these .

- - 1. Given the reported and , as well as the initial conditions , , and , the states are evolved a single step ahead to compute , , and , using the following modified forward Euler method:
    2. In practice, the simulation timestep can be divided into sub-timesteps, and the entire process (i–iv) can be repeated, so as to reduce the inaccuracy of forward Euler integration.
  1. Apply sim_dyn to each of the augmented state initial conditions state_aug_ic and inputs input_ic to generate a 1-timestep-evolved augmented state. Append state_aug_ic to the MATLAB array sim_dataset.state_aug.prev, append input_ic to the MATLAB array sim_dataset.input, and append the 1-timestep-evolved augmented state to the MATLAB array sim_dataset.state_aug.next.

1. Save the accumulated sim_dataset to sim_datasets/sim_dataset_dt_1_atc_77.mat (dt_1 refers to the simulation timestep multiple of the experimental dataset, and atc_77 refers to the actuator time constant in milliseconds.)

### Script 4: Koopman Model Setup and Training (scripts/feedback_system/script_04_koopman_setup_and_training.m)

1. Define a center-of-mass (COM) function COM_remap(x) which transforms the human state (specifically, the joint angles stored in ) to the COM position relative to the ankle, based on the human body parameters defined in human_param. Also calculate the derivative of that function, COM_remap_deriv(x).
2. **USER INPUT** Set the number of membership functions to utilize, as well as the shape factor for the membership functions, .
3. Take all states in the human_dataset STS dataset, and calculate the COM for each state in the dataset. Utilize -means clustering to cluster these COM points into clusters and report these clusters, as well as their means and standard deviations , in the MATLAB struct clust.
4. Define membership functions , defined as follows:

The function RBF_eval(x) takes in a state and returns all membership function outputs, stacked as a vector. The MATLAB cell array RBF_set stores each membership function individually. The MATLAB cell array RBF_deriv_set stores each membership function derivative ; this calculation utilizes COM_remap_deriv.

1. Define SMP functions using the membership functions , and using the augmented state as the state. Store this information in the MATLAB struct array SMP_lift.
2. Define the SMP inversion function as ginv.
3. Use SMP_lift to lift the simulate data in sim_dataset to the form of a lifted state data . Use ridge regression to find the system matrices and which minimizes the following cost :

With the added constraint that only the terms of which correspond to the position of the actuator state alone in the lifting function are allowed to be nonzero. Store these matrices in the MATLAB struct model.

### Script 5: LQR Hyperparameter Optimization and Simulation (scripts/feedback_system/script_04_koopman_setup_and_training.m)

1. Define the number of simulation steps to take for the 2.5 second duration (2.5 s * 480 Hz = 1200 timesteps) as sim_steps.
2. Iterate over all experimental human trajectories in human_ts_pairs and find the mean state trajectory over all experimental human trajectories. Store this as human_traj_ref.
3. Define the initial simulation state as the initial state of human_traj_ref.
4. **SUBROUTINE DEFINITION** This is the procedure to compute a closed-loop model (encoded by its system matrix as A_cl_est) and simulated augmented state trajectory state_aug_test_sim_history, given specific LQR hyperparameters , , and :
   1. From the open-loop model model, extract the reduced-system matrix from by removing the first row and column of . Extract the reduced-system matrix from by removing its first row.
   2. Use MATLAB’s dlqr function to solve for the optimal LQR controller for the linear system defined by and , with objective function hyperparameters and .
   3. Append the control bias hyperparameter to to form the control gain : .
   4. Compute the “raw” closed-loop system matrix .
   5. Compute the eigendecomposition (diagonalization) for :
   6. Consider all eigenvalues in . With the exception of the eigenvalue, if they have a magnitude greater than a threshold of are scaled in magnitude down to , preserving their argument. Call this transformed eigenvalue matrix “”. (This threshold corresponds to the average convergence rate of the human STS trajectories toward stand at the end of the trajectories.)
   7. Construct the closed-loop system matrix .
5. **SUBROUTINE DEFINITION** This is the procedure to compute a simulated augmented state trajectory state_aug_test_sim_history, given a specific closed-loop system matrix :
   1. Compute the initial simulation actuator state by finding the which minimizes the cost function defined by this sub-process, and set it to gamma_init_test:
      1. Use SMP_lift to lift the initial simulation state and the initial actuator state to the initial simulation lifted state .
      2. Simulate forward the lifted state for 100 timesteps, using as an update rule.
      3. Extract the simulated state from the lifted state simulated trajectory.
      4. Compare the simulated state trajectory () to the first 100 steps of human_traj_ref (“”) to compute the cost function to be minimized:

Notably, due to the structure of the SMP and functions, this entire process is a linear least-squares problem with as a linearly involved parameter. Consequently, the algorithm for computing involves calculating the matrix and vector such that

and then solving for the linear least-squares solution.

- 1. Use SMP_lift to lift the initial simulation state and the initial actuator state to the initial simulation lifted state . Store this as the first element of the array z_test_sim_history, which will ultimately contain all of the simulation lifted states.
  2. Iterate over sim_steps timesteps: Calculate subsequent lifted states with , and store them in z_test_sim_history.
  3. Use ginv to calculate the state trajectory simulation state_aug_test_sim_history from the lifted state trajectory simulation z_test_sim_history.

1. **SUBROUTINE DEFINITION** This is the procedure to compute the LQR hyperparameter given specific LQR hyperparameters , :
   1. Define the following cost function in terms of a given :
      1. Run Subroutine 4 to calculate the closed-loop system matrix given , , and .
      2. Compute the eigendecomposition (diagonalization) for : .
      3. Identify the eigenvector which corresponds to the eigenvalue of (i.e., the one-eigenvector). (The existence of such an eigenvalue is guaranteed by the construction of the SMP lifting function .)
      4. Scale so that its first element is equal to to calculate the lifted state equilibrium .
      5. Calculate the state equilibrium .
      6. Given the terminal state of human_traj_ref, define as follows:

Where only penalizes errors in joint angle, not joint velocity.

- 1. Because is not linear-least-squares with respect to , a nonlinear optimization method must be used. MATLAB’s fminunc iterative unconstrained optimization is used to find the which minimizes .

1. **SUBROUTINE DEFINITION** This is the procedure to generate matrices and from a minimal set of real-number scalar hyperparameters, called LQR_param.
   1. Raise to the power of each element of LQR_param. Call this new strictly positive vector “”.
   2. Initialize as an identity matrix of the appropriate size (3x3, for this work).
   3. Scale the entire matrix by to the power of the first element of .
   4. Scale the second and third diagonal elements of the matrix by the next two elements of .
   5. Initialize as an identity matrix of the appropriate size (29x29, for this work, since the SMP lifting function is 30-dimensional, and the system is reduced to remove the uncontrollable term of ).
   6. Set all of the diagonal terms corresponding to the membership functions alone in to zero.
   7. The next elements of each correspond to one of the membership functions . For each membership function, scale all of the diagonal terms corresponding to products of that membership function in by the corresponding element of .
   8. The remaining elements of correspond to individual diagonal terms of the matrix, specifically all terms corresponding to , , , , , , , , and all of their products in . These diagonal terms are scaled by their corresponding element of .
2. Initialize LQR_param to the appropriate length as per Subroutine 7, with all zeros.
3. Define the following cost function in terms of a given LQR_param:
   1. Run Subroutine 7 to generate and matrices.
   2. Run Subroutine 6 to compute the vector.
   3. Run Subroutine 4 to compute the closed-loop system matrix .
   4. Run Subroutine 5 to simulate STS, generating the trajectory state_aug_test_sim_history.
   5. Compare the simulated state trajectory () taken from state_aug_test_sim_history to human_traj_ref (“”) over all time points:

Where weights the important of body center-of-mass trajectory tracking vs. joint angle/velocity tracking when tuning and .

1. Use MATLAB’s fmincon constrained optimizer to find the LQR_param which minimizes . Given the high dimensionality of LQR_param, take an iterative approach:
   1. Start by optimizing over the first parameter of LQR_param until a local minimum is found, constrained to a narrow bound of .
   2. Repeat a) for each parameter of LQR_param.
   3. Repeat a) and b) six times, each time widening the bounds for the parameter.
2. Run Subroutine 7 to generate and matrices from the optimized LQR_param.
3. Run Subroutine 6 to compute the vector.
4. Run Subroutine 4 to compute the closed-loop system matrix .
5. Run Subroutine 5 to simulate STS, generating the trajectory state_aug_test_sim_history.
6. Save all the processed data produced in Scripts 1–5 in results_for_figures/paper_CL_results.mat.

## D. Terminal Convergence Rate Analysis (run_terminal_convergence_analysis.m)

### Script 1: Data Loading (scripts/feedback_system/script_01_data_loading.m)

Same content as script as for Process A; see Process A Script 1 pseudocode.

### Script 2: Define Human Parameters (scripts/feedback_system/script_02_define_human_parameters.m)

Same content as script as for Process A; see Process A Script 2 pseudocode.

### Script 3: Terminal Convergence Rate Analysis (scripts/feedback_system/ script_03ALTERNATIVE_convergence_rate_analysis.m)

1. Define a center-of-mass (COM) function COM_remap(x) which transforms the human state (specifically, the joint angles stored in ) to the COM position relative to the ankle, based on the human body parameters defined in human_param. Also calculate the derivative of that function, COM_remap_deriv(x).
2. **USER INPUT** Set the center-of-mass threshold cutoff_threshold that defines the start time of the “terminal convergence portion” of each STS trajectory.
3. For each STS trajectory traj of human_dataset:
   1. Calculate the body center-of-mass trajectory for traj using COM_remap().
   2. Determine the first time-like index of the center-of-mass trajectory at which the center-of-mass is within cutoff_threshold of the center-of-mass at the end of the trajectory. Set this to start_index.
   3. Crop the state vector traj.states to start at start_index. Set this to states_terminal.
   4. Crop the time vector traj.time to start at start_index. Set this to time_terminal.
   5. Subtract the first element of time_terminal from time_terminal, so that the new vector starts at a time of zero, and set this to time_terminal_zeroed.
   6. Subtract the last element of states_terminal from states_terminal, so that the new vector ends with zero deviation from the final state, and set this to states_terminal_zeroed.
   7. Save all of these vectors generated from traj, as well as some relevant metadata and the original information in traj, to the new dataset human_dataset_terminal.
4. For each STS trajectory traj of human_dataset_terminal:
   1. Define the curve fitting model converge_fit_fun(,) with parameters and input :
   2. Use MATLAB’s lsqcurvefit to fit parameters to converge_fit_fun, using time_terminal as the input and the joint angles in states_terminal as the output. Save this parameter fit to fit.params.
   3. Define the function fit.eval() to evaluate the fit, as converge_fit_fun(fit.params,).
   4. Set the fit rate constant (the first element of fit.params) to fit.rate.
   5. Calculate the fit time constant as the reciprocal of fit.rate, and set it to fit.time_constant.
   6. Add fit to traj in human_dataset_terminal.
5. Save human_dataset_terminal and relevant supporting data to results_for_figures/paper_convergence_results.mat.

# References

1 Koopman, B. O. Hamiltonian Systems and Transformation in Hilbert Space. *Proceedings of the National Academy of Sciences* **17**(5), 315–318 (1931).

2 Shapiro, J. H. *Composition Operators and Classical Function Theory*. (Springer-Verlag, New York, 1993).

3 Mezić, I., & Banaszuk, A. Comparison of systems with complex behavior. *Physica D: Nonlinear Phenomena*, **197**(1–2), 101–133 (2004).

4 Budišić, M., Mohr, R., & Mezić, I. Applied Koopmanism. *Chaos* **22**(4) (2012).

5 Brunton, S. L., Budišić, M., Kaiser, E., & Kutz, J. N. Modern Koopman Theory for Dynamical Systems. *SIAM Review* **64**(2), 229–340 (2022).

6 Williams, M. O., Kevrekidis, I. G., & Rowley, C. W. (2015). A Data–Driven Approximation of the Koopman Operator: Extending Dynamic Mode Decomposition. *Journal of Nonlinear Science* **25**(6), 1307–1346 (2015).

7 Asada, H. H. Global, Unified Representation of Heterogenous Robot Dynamics Using Composition Operators: A Koopman Direct Encoding Method. *IEEE/ASME Transactions on Mechatronics* **28**(5), 2633–2644 (2023).

8 Ng, J., & Asada, H. H. Data-Driven Encoding: A New Numerical Method for Computation of the Koopman Operator. *IEEE Robotics and Automation Letters* **8**(7), 3940–3947 (2023).

9 Asada, H. H., & Solano-Castellanos, J. A. Control-Coherent Koopman Modeling: A Physical Modeling Approach. *2024 IEEE 63rd Conference on Decision and Control (CDC)* (2024).

10 Delp, S. L., Anderson, F. C., Arnold, A. S., Loan, P., Habib, A., John, C. T., Guendelman, E., & Thelen, D. G. OpenSim: Open-source software to create and analyze dynamic simulations of movement. *IEEE Transactions on Biomedical Engineering* **54**(11), 1940–1950 (2007).

11 Zajac, F. E. Muscle and tendon: properties, models, scaling, and application to biomechanics and motor control. *Critical Reviews in Biomedical Engineering* **17**(4), 359–411 (1989).

12 Schutte, L. M., Rodgers, M. M., Zajac, F. E., & Glaser, R. M. Improving the Efficacy of Electrical Stimulation-Induced Leg Cycle Ergometry: An Analysis Based on a Dynamic Musculoskeletal Model. *IEEE Transactions on Rehabilitation Engineering* **1**(2), 109–125 (1993).

13 Martins, J. A. C., Pires, E. B., Salvado, R., & Dinis, P. B. A numerical model of passive and active behavior of skeletal muscles. *Computer Methods in Applied Mechanics and Engineering* **151**(3–4), 419–433 (1998).

14 Holmes, P. D. Perturbative Sit-to-Stand Experiment Dataset and Stability Basin Code [Data set]. University of Michigan - Deep Blue Data. https://doi.org/10.7302/mhjr-k798 (2019).
